# Supplementary material
Source: PubMed Central journal article supplement (PMC8842839)
Supplement: NIHMS1773095-supplement-Figure__supplemental_digital_content_2.pdf [file NIHMS1773095-supplement-Figure__supplemental_digital_content_2.pdf]

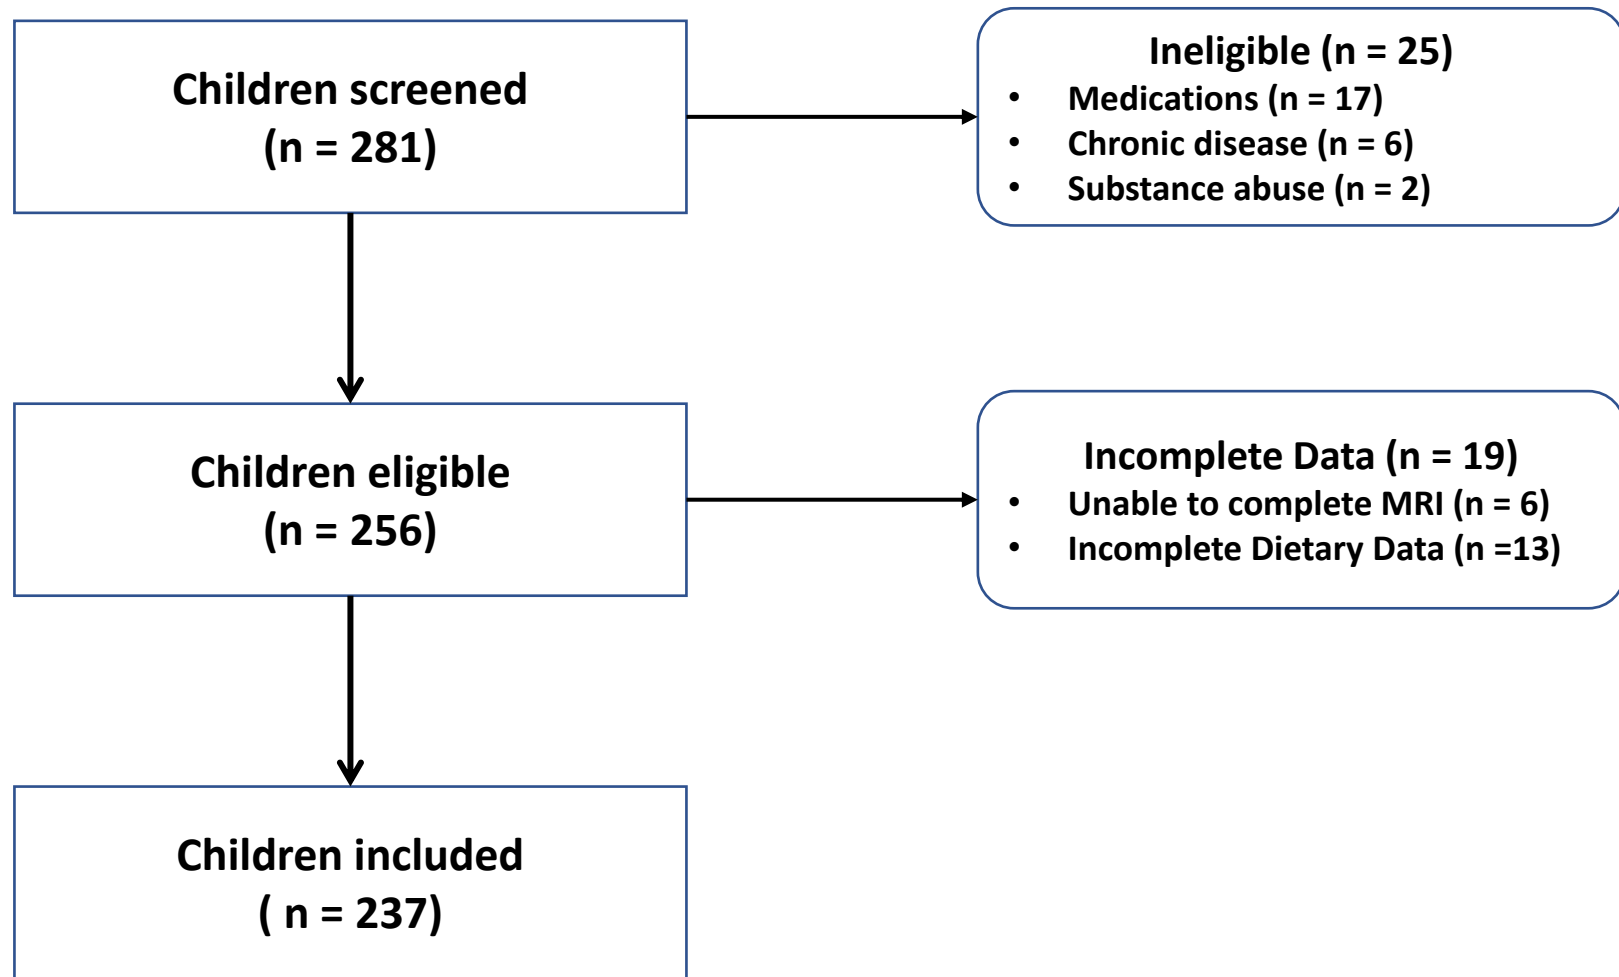

**Figure, Supplemental Digital Content 2.**

Study flow diagram of the process of screening, exclusion, and inclusion of study participants.
