# Supplementary material
Source: PubMed Central journal article supplement (PMC8842839)
Supplement: NIHMS1773095-supplement-Figure__supplemental_digital_content_3.pdf [file NIHMS1773095-supplement-Figure__supplemental_digital_content_3.pdf]

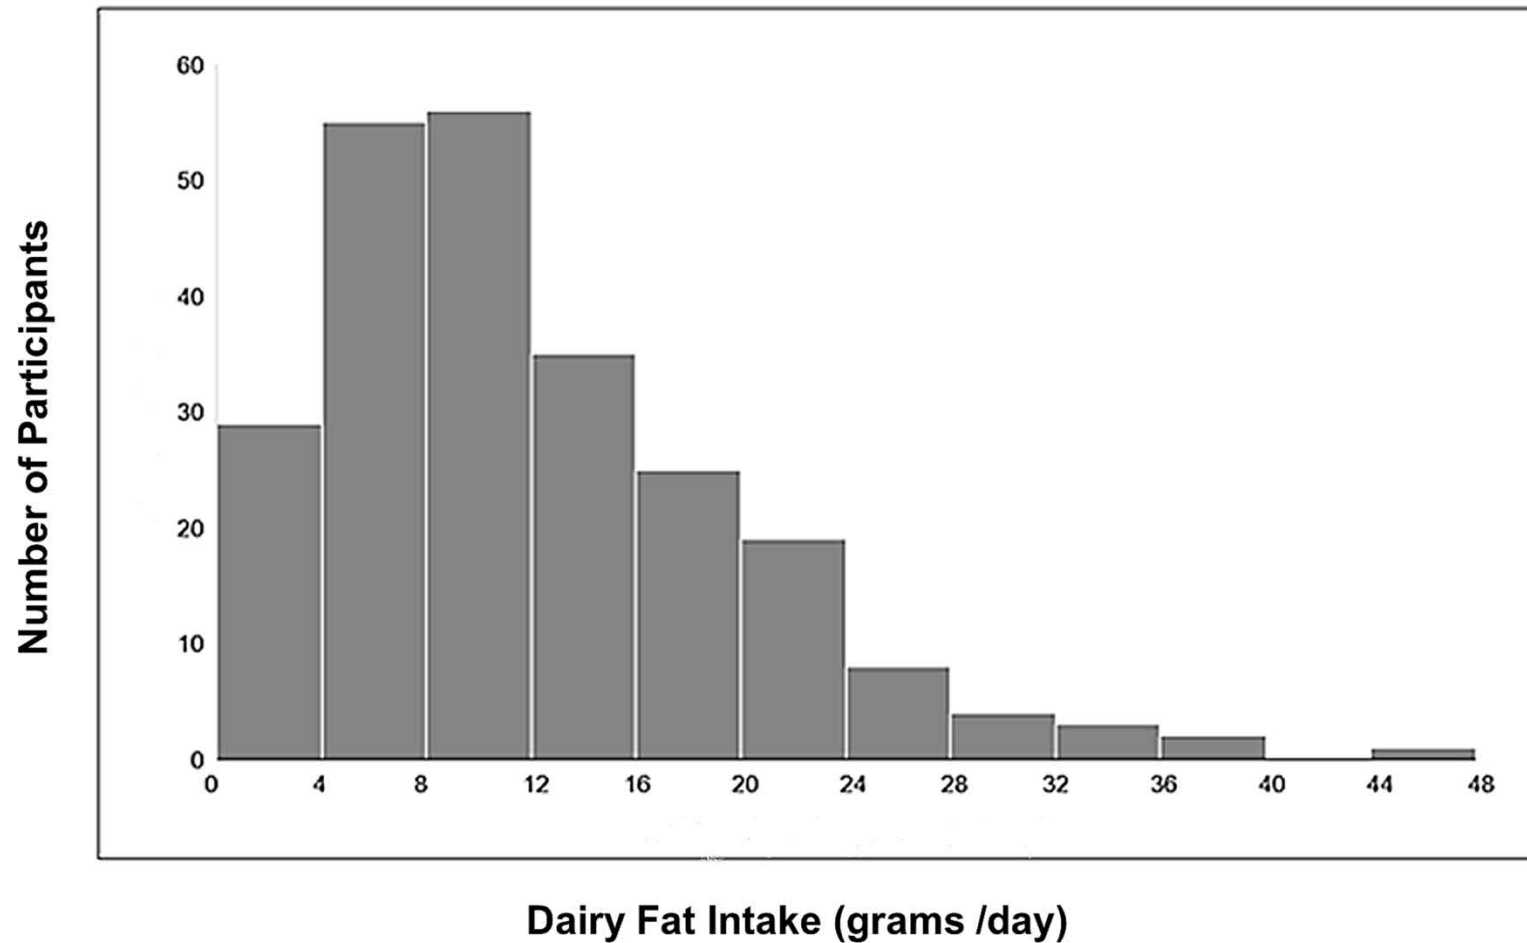

**Figure, Supplemental Digital Content 3. Distribution of Daily Dairy Fat Intake in Children**

Dairy fat intake was calculated in grams per day based upon an average of three separate 24-hour dietary recalls. Intake is shown in multiple of 4 grams per day (e.g. 0-4, 5-8, 9-12, etc.).
