# Supplementary material
Source: PubMed Central journal article supplement (PMC8842839)
Supplement: NIHMS1773095-supplement-Supplemental_Figure_4.pdf [file NIHMS1773095-supplement-Supplemental_Figure_4.pdf]

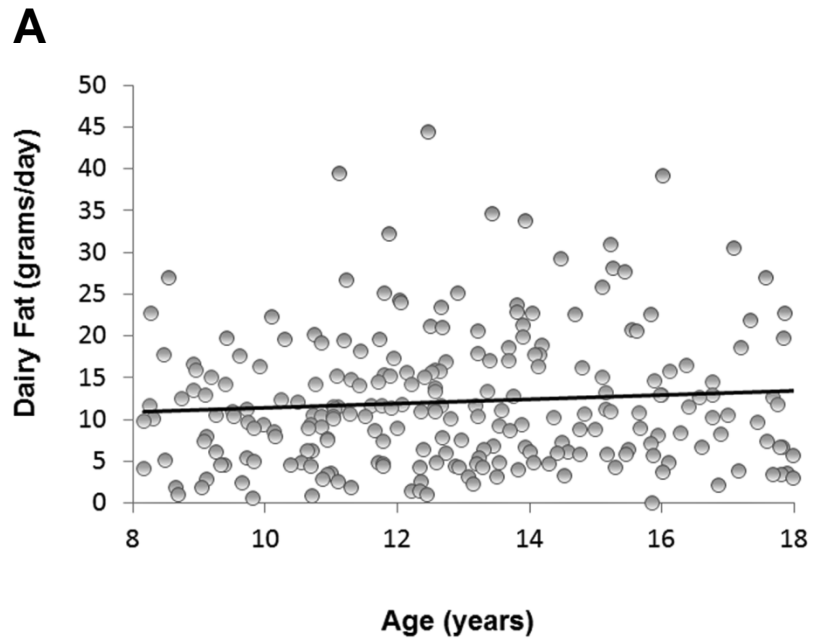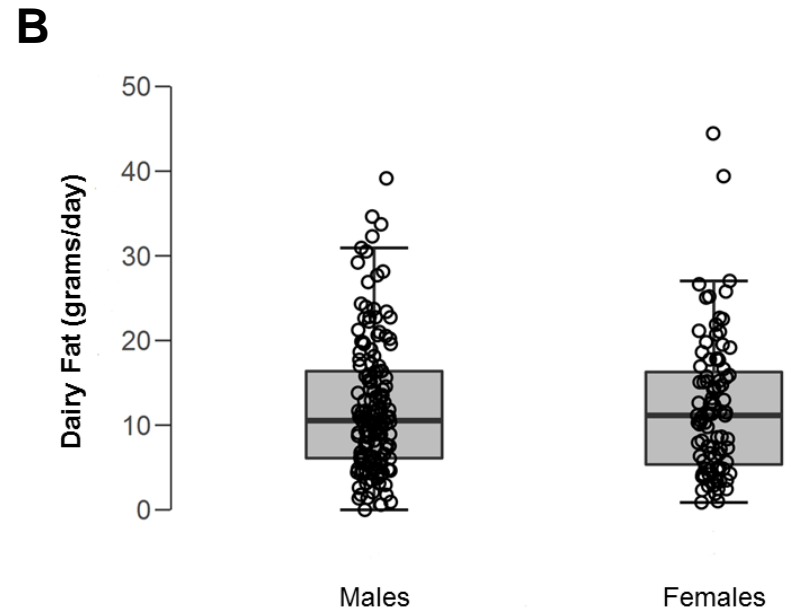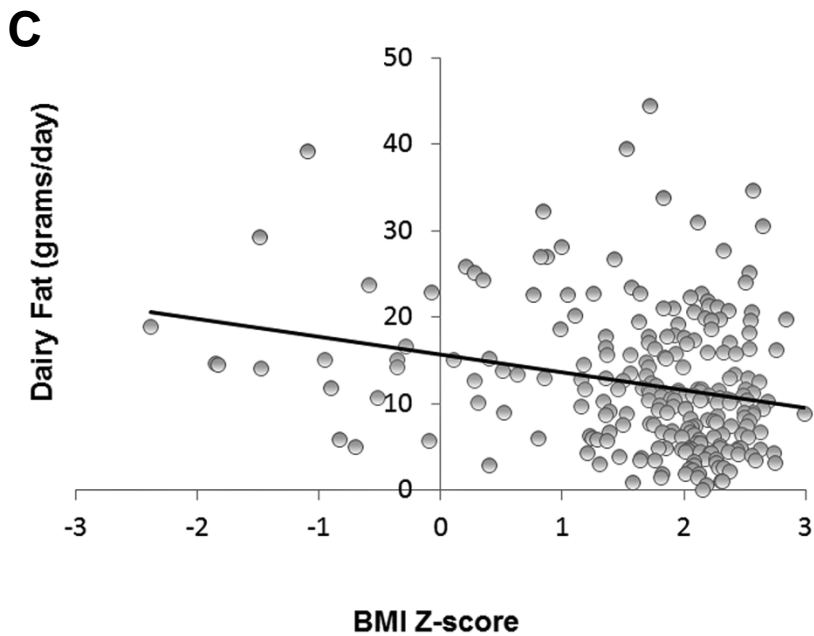

**Figure, Supplemental Digital Content 4.**  
**Distribution of daily dairy fat intake by age (A), sex (B), and BMI z-score (C).**  
 Dairy fat intake was not significantly associated with age ( $r = 0.06$ ,  $p = 0.148$ ) and did not significantly differ by sex ( $p = 0.911$ ). Dairy fat intake was significantly inversely associated BMI z-score ( $r = -0.20$ ,  $p = 0.002$ ).
