# Supplementary material
Source: PubMed Central journal article supplement (PMC8842839)
Supplement: NIHMS1773095-supplement-Supplemental_Figure_5.pdf [file NIHMS1773095-supplement-Supplemental_Figure_5.pdf]

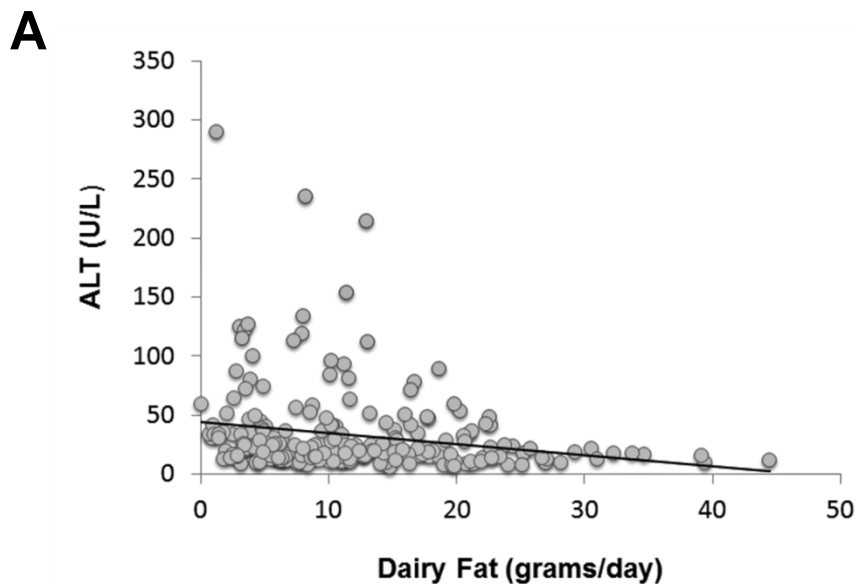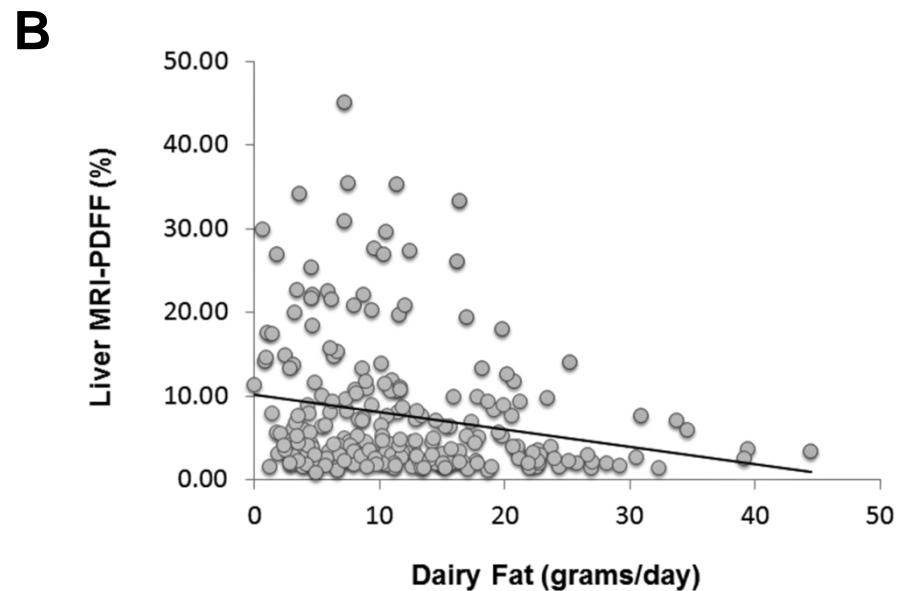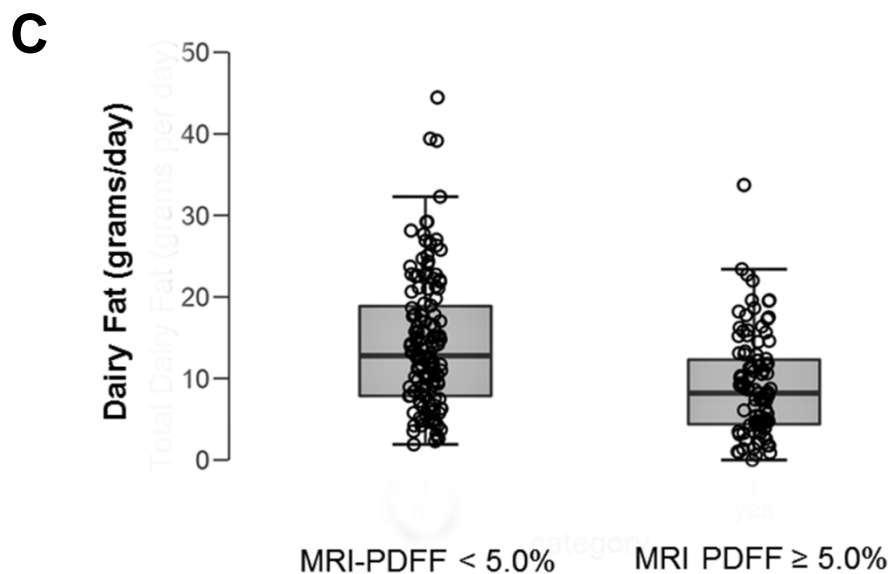

**Figure, Supplemental Digital Content 5.**

**Daily intake of dairy fat vs ALT (A) and liver MRI-PDFF (B).**

Dairy fat intake significantly negatively correlated with ALT ( $r = -0.18$ ,  $p = 0.007$ ) and liver MRI-PDFF ( $r = -0.162$ ;  $p = .012$ ).

**Daily intake of dairy fat for children with liver MRI-PDFF < 5.0% vs children with liver MRI ≥ 5.0% (C).** Children with MRI liver-PDFF ≥ 5% had significantly lower dairy fat intake than children with liver MRI-PDFF < 5% (mean 9.1 grams/day vs 14.2 grams/day;  $p < 0.001$ )
