# Supplementary material
Source: PubMed Central journal article supplement (PMC8842839)
Supplement: NIHMS1773095-supplement-Table__Supplemental_Digital_Content_1.pdf [file NIHMS1773095-supplement-Table__Supplemental_Digital_Content_1.pdf]

**Table, Supplemental Digital Content 1. Plasma Fatty Acids Measured**

| <b>Fatty Acid</b> | <b>Name</b>                     | <b>Class</b> |
|-------------------|---------------------------------|--------------|
| C12:0             | Lauric acid                     | MCFA         |
| C14:0             | Myristic acid                   | LCFA         |
| C14:1             | Myristoleic                     | MUFA         |
| C15:0             | Pentadecanoic acid              | OCFA         |
| C16:1             | Palmitoleic acid                | MUFA         |
| C16:0             | Palmitic acid                   | LCFA         |
| iso-C16:0         | iso-palmitic acid               | BCFA         |
| C17:0             | Heptadecanoic acid              | OCFA         |
| C17:1             | Heptadecenoate                  | MUFA         |
| Iso-C17:0         | iso-heptadecanoic acid          | BCFA         |
| Anteiso- C17:0    | anteiso-heptadecanoic acid      | BCFA         |
| Iso-C18:0         | iso-octadecanoate               | BCFA         |
| C18:2             | Linoleic acid                   | PUFA         |
| C18:3, n-3        | $\alpha$ -linolenic acid        | PUFA         |
| C18:3, n-6        | $\gamma$ -linolenic acid        | PUFA         |
| C18:1             | Oleic acid                      | MUFA         |
| C18:0             | Stearic acid                    | LCFA         |
| C20:2             | 11,14-eicosadienoic acid        | PUFA         |
| C20:3, n-3        | 11,14,17-eicosatrienoic acid    | PUFA         |
| C20:3, n-6        | Dihomo- $\gamma$ -linoleic acid | PUFA         |
| C20:5, n-3        | Eicosapentaenoic acid           | PUFA         |
| C20:4, n-6        | Arachidonic acid                | PUFA         |
| C20:0             | Arachidic acid                  | VLCFA        |
| C20:1n9           | 11-eicosenoic                   | MUFA         |
| C22:6, n-3        | Docosahexaenoic acid            | PUFA         |
| C22:1n9           | Erucic                          | PUFA         |
| C22:2             | 13,16-docosadienoic acid        | PUFA         |
| C22:0             | Behenic acid                    | VLCFA        |
| C24:1n9           | Nervonic acid                   | MUFA         |

MCFA = medium chain fatty acid

LCFA = long chain fatty acid

MUFA = monounsaturated fatty acid

OCFA = odd chain fatty acid

BCFA = branched chain fatty acid

PUFA = polyunsaturated fatty acid

VLCFA = very long chain fatty acid
